# Supplementary material
Source: PubMed Central journal article supplement (PMC7094721)
Supplement: mmc1.pdf [file mmc1.pdf]

## Supplementary Figure 1

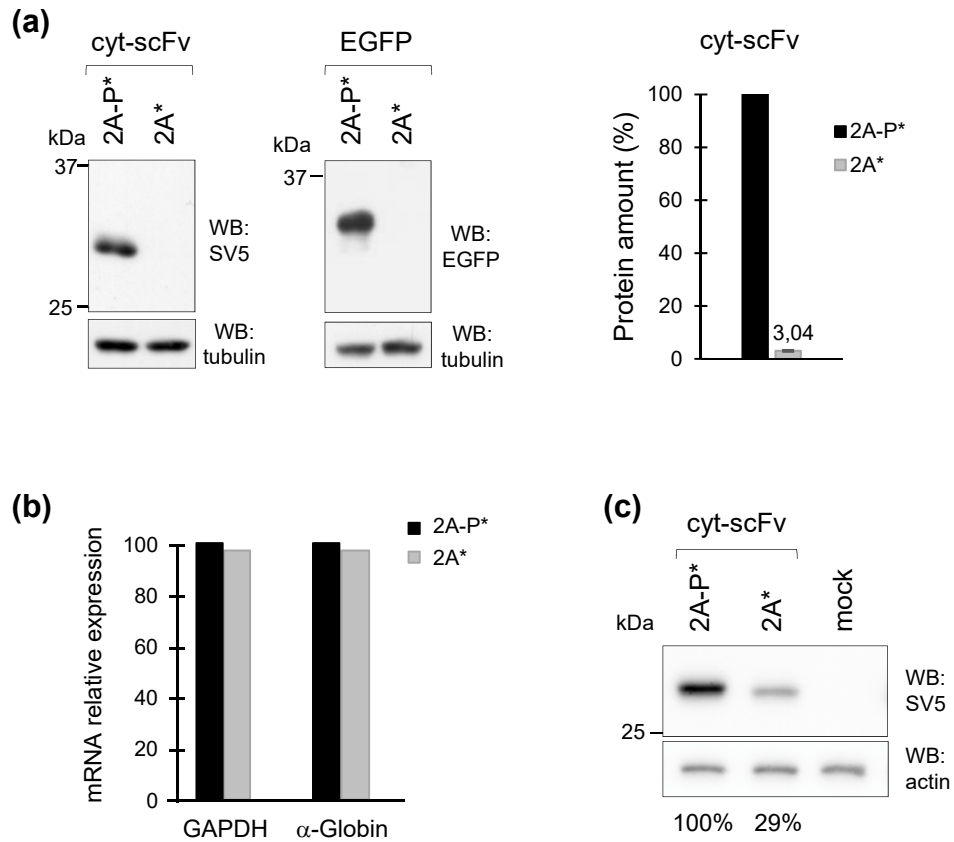

**C-terminal 2A\* compromises the expression of cytosolic proteins.** **(a)**, Western blot (left panel) and quantification (right panel, shown for cyt-scFv) of cell extracts transfected with reporters encoding the cytosolic proteins cyt-scFv or EGFP terminating in 2A-P\* or 2A\*, as indicated. Data presented as mean  $\pm$  S.E.M. of  $n = 3$  independent experiments. **(b)**, RT-PCR quantification of mRNA levels in cells transfected with constructs 2A-P\* (black) or 2A\* (grey) and normalized to the endogenous GAPDH mRNA or to a co-transfected  $\alpha$ -Globin encoding control plasmid. Representative of  $n = 3$  independent experiments **(c)**, Western blot representative of  $n = 3$  of the cytosolic reporter produced in a reticulocyte *in vitro* translation system.

## Supplementary Figure 2

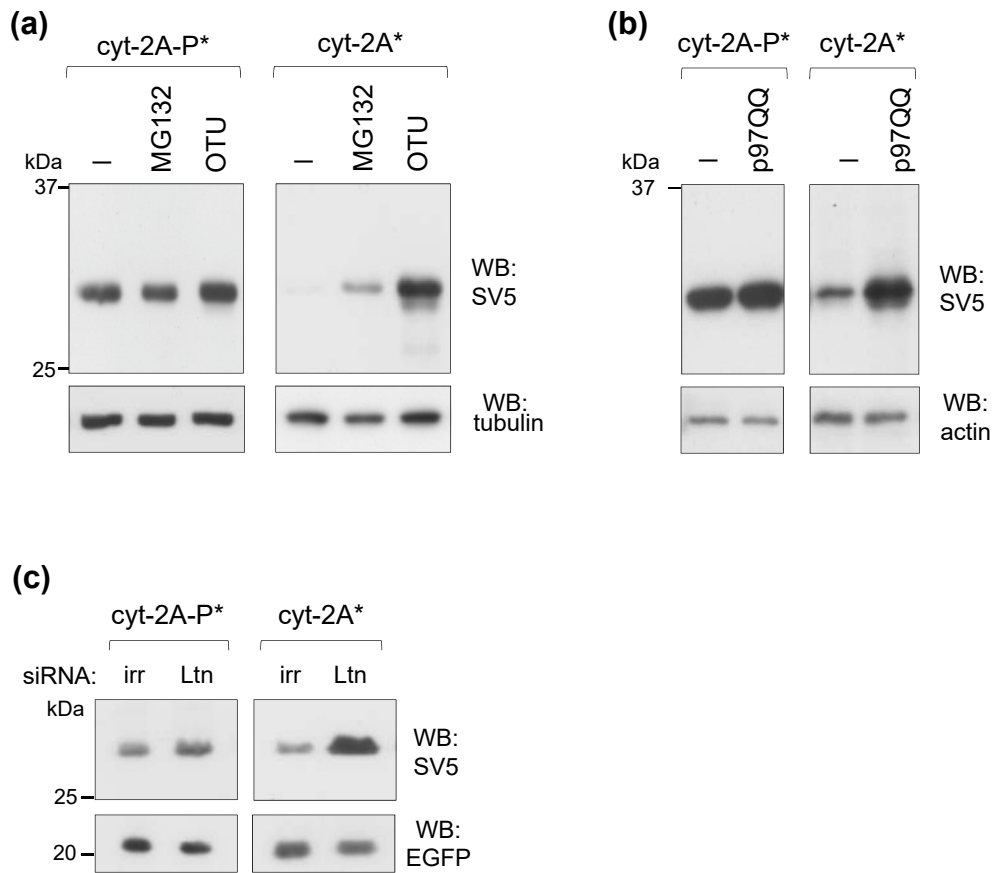

**Proteasomal degradation of cytosolic 2A\* proteins.** (a-b), Western blots of the cytosolic constructs co-transfected, where indicated, with OTU, p97QQ or treated with MG132 for 4 h. Representative of  $n = 3$  independent experiments. (c), Western blot of cells transfected with the indicated constructs in cells transfected 48 h before with the Ltn-specific or the irrelevant siRNA, as indicated. Representative of  $n = 2$  independent experiments.

## Supplementary Table 1

### Mass Spectrometry analysis of 2A-P\* termination

| spectrum | log(e) | log(l) | m+h      | delta  | z | zeta  | pre  | start | sequence              | end | post | modifications |
|----------|--------|--------|----------|--------|---|-------|------|-------|-----------------------|-----|------|---------------|
| 656,1    | -2,7   | 5,52   | 1381,689 | -0,088 | 2 | 0,5   | vatg | 17    | VHSDIVMTQSHK          | 28  | fmst |               |
| 681,1    | -2,4   | 7,22   | 1058,53  | 0,014  | 1 | 0,333 | gvhs | 20    | DIVMTQSHK             | 28  | fmst |               |
| 1214,1   | -4,2   | 8,05   | 999,456  | -0,114 | 2 |       | qshk | 29    | FMSTSVGDR             | 37  | vsit |               |
| 1291,1   | -3,9   | 7,24   | 999,456  | -0,14  | 2 |       | qshk | 29    | FMSTSVGDR             | 37  | vsit |               |
| 735,1    | -3,6   | 7,01   | 1015,451 | -0,022 | 2 |       | qshk | 29    | FMSTSVGDR             | 37  | vsit | M30#15.99492  |
| 1231,1   | -2,7   | 8,37   | 999,456  | -0,112 | 2 |       | qshk | 29    | FMSTSVGDR             | 37  | vsit |               |
| 1403,1   | -2,6   | 6,48   | 999,456  | -0,083 | 2 |       | qshk | 29    | FMSTSVGDR             | 37  | vsit |               |
| 1198,1   | -2,4   | 7,4    | 999,456  | -0,167 | 2 |       | qshk | 29    | FMSTSVGDR             | 37  | vsit |               |
| 772,1    | -2,3   | 7,35   | 1015,451 | -0,077 | 2 |       | qshk | 29    | FMSTSVGDR             | 37  | vsit | M30#15.99492  |
| 756,1    | -2     | 7,37   | 1015,451 | -0,102 | 2 |       | qshk | 29    | FMSTSVGDR             | 37  | vsit | M30#15.99492  |
| 1278,1   | -1,9   | 7,65   | 999,456  | -0,085 | 2 |       | qshk | 29    | FMSTSVGDR             | 37  | vsit |               |
| 1431,1   | -1,3   | 6,1    | 999,456  | -0,012 | 2 |       | qshk | 29    | FMSTSVGDR             | 37  | vsit |               |
| 785,1    | -1,2   | 6,85   | 1015,451 | -0,064 | 2 |       | qshk | 29    | FMSTSVGDR             | 37  | vsit | M30#15.99492  |
| 3144,1   | -7,9   | 7,45   | 1681,818 | -0,058 | 2 |       | itck | 44    | ASQDVSTAVAWYQQK       | 58  | pgqs |               |
| 3118,1   | -7,5   | 7,67   | 1681,818 | -0,023 | 2 |       | itck | 44    | ASQDVSTAVAWYQQK       | 58  | pgqs |               |
| 3096,1   | -6,9   | 6,67   | 1681,818 | -0,073 | 2 |       | itck | 44    | ASQDVSTAVAWYQQK       | 58  | pgqs |               |
| 3167,1   | -6     | 6,6    | 1681,818 | 0,0061 | 2 |       | itck | 44    | ASQDVSTAVAWYQQK       | 58  | pgqs |               |
| 3143,1   | -5,9   | 7,48   | 1681,818 | -0,074 | 3 | 1,5   | itck | 44    | ASQDVSTAVAWYQQK       | 58  | pgqs |               |
| 3098,1   | -4,6   | 6,82   | 1681,818 | 0,93   | 3 | 1,5   | itck | 44    | ASQDVSTAVAWYQQK       | 58  | pgqs |               |
| 3119,1   | -3,7   | 7,54   | 1681,818 | -0,023 | 3 | 1,5   | itck | 44    | ASQDVSTAVAWYQQK       | 58  | pgqs |               |
| 3168,1   | -2,7   | 6,59   | 1681,818 | 0,967  | 3 | 1,5   | itck | 44    | ASQDVSTAVAWYQQK       | 58  | pgqs |               |
| 2683,1   | -9,4   | 7,22   | 2277,115 | 2,196  | 2 | 0,667 | itck | 44    | ASQDVSTAVAWYQQKPGQSPK | 64  | lly  | Q46#0.98402   |
| 2718,1   | -6     | 6,88   | 2277,115 | -0,024 | 2 | 0,667 | itck | 44    | ASQDVSTAVAWYQQKPGQSPK | 64  | lly  | Q46#0.98402   |
| 2672,1   | -5,6   | 6,77   | 2276,131 | 1,567  | 2 | 0,667 | itck | 44    | ASQDVSTAVAWYQQKPGQSPK | 64  | lly  |               |
| 2697,1   | -3,6   | 7,37   | 2276,131 | -0,036 | 2 | 0,667 | itck | 44    | ASQDVSTAVAWYQQKPGQSPK | 64  | lly  |               |
| 2840,1   | -2     | 7,59   | 1085,599 | -0,08  | 2 |       | qspk | 65    | LLIYSASYR             | 73  | ytgv |               |
| 2777,1   | -1,7   | 8,14   | 1085,599 | -0,027 | 2 |       | qspk | 65    | LLIYSASYR             | 73  | ytgv |               |
| 2794,1   | -1,7   | 8,42   | 1085,599 | -0,037 | 2 |       | qspk | 65    | LLIYSASYR             | 73  | ytgv |               |
| 2863,1   | -1,4   | 6,84   | 1085,599 | -0,008 | 2 |       | qspk | 65    | LLIYSASYR             | 73  | ytgv |               |
| 1041,1   | -1,5   | 6,66   | 791,441  | 0,057  | 1 | 0,5   | asyr | 74    | YTGVPVR               | 80  | ftgs |               |
| 198,1    | -6,8   | 5,14   | 1466,672 | -0,074 | 2 | 0,667 | leik | 127   | GSTSGSGKPGSGEGSSK     | 143 | gevq |               |

Supplementary Table 1

|        |       |      |          |        |   |       |      |     |                                 |     |                   |
|--------|-------|------|----------|--------|---|-------|------|-----|---------------------------------|-----|-------------------|
| 309,1  | -5,4  | 5,72 | 1466,672 | -0,05  | 2 | 0,667 | leik | 127 | GSTSGSGKPGSGEGSSK               | 143 | gevq              |
| 215,1  | -5,2  | 5,69 | 1466,672 | -0,12  | 2 | 0,667 | leik | 127 | GSTSGSGKPGSGEGSSK               | 143 | gevq              |
| 244,1  | -2,6  | 5,14 | 1466,672 | 0,863  | 3 | 1     | leik | 127 | GSTSGSGKPGSGEGSSK               | 143 | gevq              |
| 321,1  | -2,4  | 6,29 | 1466,672 | -0,161 | 3 | 1     | leik | 127 | GSTSGSGKPGSGEGSSK               | 143 | gevq              |
| 232,1  | -1,8  | 5,72 | 1466,672 | -0,167 | 3 | 1     | leik | 127 | GSTSGSGKPGSGEGSSK               | 143 | gevq              |
| 336,1  | -1,4  | 5,43 | 1466,672 | -0,133 | 2 | 0,667 | leik | 127 | GSTSGSGKPGSGEGSSK               | 143 | gevq              |
| 275,1  | -1,1  | 5,24 | 1466,672 | -0,09  | 3 | 1     | leik | 127 | GSTSGSGKPGSGEGSSK               | 143 | gevq              |
| 204,1  | -1,1  | 6,62 | 1466,672 | -0,052 | 3 | 1     | leik | 127 | GSTSGSGKPGSGEGSSK               | 143 | gevq              |
| 1869,1 | -6,9  | 6,9  | 2961,451 | 1,81   | 3 | 0,75  | leik | 127 | GSTSGSGKPGSGEGSSKGEVQLQQSGAELVR | 157 | sgas              |
| 1883,1 | -6,3  | 7,13 | 2961,451 | -0,218 | 3 | 0,75  | leik | 127 | GSTSGSGKPGSGEGSSKGEVQLQQSGAELVR | 157 | sgas              |
| 1909,1 | -5,3  | 6,5  | 2961,451 | 2,385  | 3 | 0,75  | leik | 127 | GSTSGSGKPGSGEGSSKGEVQLQQSGAELVR | 157 | sgas              |
| 1895,1 | -2,5  | 8,16 | 2961,451 | 1,76   | 4 | 1     | leik | 127 | GSTSGSGKPGSGEGSSKGEVQLQQSGAELVR | 157 | sgas              |
| 1860,1 | -1,3  | 6,64 | 2961,451 | -0,146 | 4 | 1     | leik | 127 | GSTSGSGKPGSGEGSSKGEVQLQQSGAELVR | 157 | sgas              |
| 2292,1 | -5,2  | 6,85 | 2300,148 | -0,183 | 3 | 1     | gsgk | 135 | PGSGEGSSKGEVQLQQSGAELVR         | 157 | sgas              |
| 2307,1 | -3,5  | 6,7  | 2300,148 | -0,117 | 3 | 1     | gsgk | 135 | PGSGEGSSKGEVQLQQSGAELVR         | 157 | sgas              |
| 2637,1 | -12,8 | 8,89 | 1513,797 | 0,023  | 2 | 1     | gssk | 144 | GEVQLQQSGAELVR                  | 157 | sgas              |
| 2657,1 | -11,7 | 8,79 | 1513,797 | -0,033 | 2 | 1     | gssk | 144 | GEVQLQQSGAELVR                  | 157 | sgas              |
| 2621,1 | -10,9 | 6,92 | 1513,797 | -0,032 | 2 | 1     | gssk | 144 | GEVQLQQSGAELVR                  | 157 | sgas              |
| 2829,1 | -9,6  | 6,89 | 1514,781 | -0,148 | 2 | 1     | gssk | 144 | GEVQLQQSGAELVR                  | 157 | sgas Q147#0.98402 |
| 2867,1 | -8,4  | 7    | 1514,781 | -0,043 | 2 | 1     | gssk | 144 | GEVQLQQSGAELVR                  | 157 | sgas Q150#0.98402 |
| 3033,1 | -8,2  | 6,94 | 1514,781 | -0,062 | 2 | 1     | gssk | 144 | GEVQLQQSGAELVR                  | 157 | sgas Q149#0.98402 |
| 2676,1 | -8,2  | 8,55 | 1513,797 | -0,041 | 2 | 1     | gssk | 144 | GEVQLQQSGAELVR                  | 157 | sgas              |
| 2558,1 | -8,1  | 6,26 | 1513,797 | -0,006 | 2 | 1     | gssk | 144 | GEVQLQQSGAELVR                  | 157 | sgas              |
| 2855,1 | -7,4  | 6,56 | 1514,781 | -0,127 | 2 | 1     | gssk | 144 | GEVQLQQSGAELVR                  | 157 | sgas Q149#0.98402 |
| 2664,1 | -7,3  | 8,43 | 1513,797 | -0,108 | 3 | 1,5   | gssk | 144 | GEVQLQQSGAELVR                  | 157 | sgas              |
| 3021,1 | -6,9  | 6,94 | 1514,781 | -0,055 | 2 | 1     | gssk | 144 | GEVQLQQSGAELVR                  | 157 | sgas Q149#0.98402 |
| 2890,1 | -6,7  | 7,03 | 1514,781 | -0,015 | 2 | 1     | gssk | 144 | GEVQLQQSGAELVR                  | 157 | sgas Q150#0.98402 |
| 2646,1 | -6,6  | 8,52 | 1513,797 | -0,006 | 3 | 1,5   | gssk | 144 | GEVQLQQSGAELVR                  | 157 | sgas              |
| 3003,1 | -6,4  | 6,87 | 1514,781 | -0,048 | 2 | 1     | gssk | 144 | GEVQLQQSGAELVR                  | 157 | sgas Q149#0.98402 |
| 2807,1 | -6,2  | 6,69 | 1514,781 | 0,019  | 2 | 1     | gssk | 144 | GEVQLQQSGAELVR                  | 157 | sgas Q147#0.98402 |
| 2908,1 | -6,1  | 6,36 | 1514,781 | -0,098 | 2 | 1     | gssk | 144 | GEVQLQQSGAELVR                  | 157 | sgas Q150#0.98402 |
| 2628,1 | -6    | 7,64 | 1513,797 | -0,023 | 3 | 1,5   | gssk | 144 | GEVQLQQSGAELVR                  | 157 | sgas              |
| 2685,1 | -5,8  | 8,14 | 1513,797 | -0,057 | 3 | 1,5   | gssk | 144 | GEVQLQQSGAELVR                  | 157 | sgas              |
| 2886,1 | -5,8  | 6,71 | 1514,781 | -0,102 | 3 | 1,5   | gssk | 144 | GEVQLQQSGAELVR                  | 157 | sgas Q150#0.98402 |
| 2564,1 | -5,2  | 6,27 | 1513,797 | -0,092 | 2 | 1     | gssk | 144 | GEVQLQQSGAELVR                  | 157 | sgas              |
| 3031,1 | -4,7  | 6,62 | 1513,797 | -0,563 | 3 | 1,5   | gssk | 144 | GEVQLQQSGAELVR                  | 157 | sgas              |
| 3007,1 | -4,7  | 6,54 | 1514,781 | 0,005  | 3 | 1,5   | gssk | 144 | GEVQLQQSGAELVR                  | 157 | sgas Q149#0.98402 |

Supplementary Table 1

|        |       |      |          |        |   |       |      |     |                           |     |      |                                                                 |
|--------|-------|------|----------|--------|---|-------|------|-----|---------------------------|-----|------|-----------------------------------------------------------------|
| 2998,1 | -4,3  | 6,87 | 1514,781 | 1,919  | 2 | 1     | gssk | 144 | GEVQLQQSGAELVR            | 157 | sgas | Q147#0.98402                                                    |
| 2708,1 | -4    | 7,13 | 1513,797 | -0,137 | 3 | 1,5   | gssk | 144 | GEVQLQQSGAELVR            | 157 | sgas |                                                                 |
| 3050,1 | -3    | 6,37 | 1514,781 | -0,109 | 3 | 1,5   | gssk | 144 | GEVQLQQSGAELVR            | 157 | sgas | Q149#0.98402                                                    |
| 2873,1 | -2,6  | 6,74 | 1514,781 | -0,041 | 3 | 1,5   | gssk | 144 | GEVQLQQSGAELVR            | 157 | sgas | Q150#0.98402                                                    |
| 2764,1 | -1,8  | 6,55 | 1513,797 | 0,836  | 2 | 1     | gssk | 144 | GEVQLQQSGAELVR            | 157 | sgas |                                                                 |
| 2603,1 | -3    | 7,39 | 1141,514 | -0,048 | 2 | 0,667 | fnik | 175 | DYYMHVVK                  | 182 | qrpe |                                                                 |
| 2643,1 | -2,5  | 7,47 | 1141,514 | 0,011  | 2 | 0,667 | fnik | 175 | DYYMHVVK                  | 182 | qrpe |                                                                 |
| 2624,1 | -1,6  | 7,96 | 1141,514 | -0,074 | 2 | 0,667 | fnik | 175 | DYYMHVVK                  | 182 | qrpe |                                                                 |
| 1936,1 | -1,4  | 6,46 | 1157,508 | -0,23  | 2 | 0,667 | fnik | 175 | DYYMHVVK                  | 182 | qrpe | M178#15.99492                                                   |
| 5096,1 | -12   | 8,76 | 2959,39  | 1,798  | 3 | 1     | hwvk | 183 | QRPEQGLEWIGWIDPENGYTEYAPK | 207 | fqgk | Q183#-                                                          |
| 4968,1 | -7,9  | 7,89 | 2976,416 | 1,849  | 3 | 1     | hwvk | 183 | QRPEQGLEWIGWIDPENGYTEYAPK | 207 | fqgk |                                                                 |
| 4980,1 | -6,6  | 8,79 | 2976,416 | 0,211  | 3 | 1     | hwvk | 183 | QRPEQGLEWIGWIDPENGYTEYAPK | 207 | fqgk |                                                                 |
| 5027,1 | -6,1  | 8,35 | 2977,4   | -0,134 | 3 | 1     | hwvk | 183 | QRPEQGLEWIGWIDPENGYTEYAPK | 207 | fqgk | N199#0.98402                                                    |
| 5070,1 | -5,6  | 7,9  | 2977,4   | -0,02  | 3 | 1     | hwvk | 183 | QRPEQGLEWIGWIDPENGYTEYAPK | 207 | fqgk | N199#0.98402                                                    |
| 5015,1 | -4,8  | 7,18 | 2976,369 | 2,052  | 4 | 1     | hwvk | 183 | QRPEQGLEWIGWIDPENGYTEYAPK | 207 | fqgk | Q183#-<br>17.02655,<br>Q187#0.98402,<br>W191#15.99492<br>Q183#- |
| 5116,1 | -4,8  | 7,14 | 2960,374 | 1,944  | 3 | 1     | hwvk | 183 | QRPEQGLEWIGWIDPENGYTEYAPK | 207 | fqgk | 17.02655,<br>N199#0.98402                                       |
| 5002,1 | -4,7  | 8,6  | 2976,416 | -0,124 | 3 | 1     | hwvk | 183 | QRPEQGLEWIGWIDPENGYTEYAPK | 207 | fqgk |                                                                 |
| 5100,1 | -4,3  | 8,02 | 2959,39  | -0,049 | 4 | 1     | hwvk | 183 | QRPEQGLEWIGWIDPENGYTEYAPK | 207 | fqgk | Q183#-                                                          |
| 4974,1 | -1,7  | 8,04 | 2976,416 | -0,118 | 4 | 1     | hwvk | 183 | QRPEQGLEWIGWIDPENGYTEYAPK | 207 | fqgk |                                                                 |
| 4470,1 | -14,3 | 7,38 | 2311,051 | -0,055 | 2 | 1     | fyyr | 247 | YDAFDYWGQGTTTLTVSSGASGK   | 268 | pipn |                                                                 |
| 4432,1 | -12,2 | 6,56 | 2311,051 | 1,106  | 2 | 1     | fyyr | 247 | YDAFDYWGQGTTTLTVSSGASGK   | 268 | pipn |                                                                 |
| 4453,1 | -11,5 | 7,32 | 2311,051 | -0,284 | 2 | 1     | fyyr | 247 | YDAFDYWGQGTTTLTVSSGASGK   | 268 | pipn |                                                                 |
| 4442,1 | -5,9  | 7,54 | 2311,051 | -0,142 | 3 | 1,5   | fyyr | 247 | YDAFDYWGQGTTTLTVSSGASGK   | 268 | pipn |                                                                 |
| 4486,1 | -5,8  | 7,21 | 2311,051 | -0,076 | 3 | 1,5   | fyyr | 247 | YDAFDYWGQGTTTLTVSSGASGK   | 268 | pipn |                                                                 |
| 4465,1 | -2,7  | 7,87 | 2311,051 | -0,042 | 3 | 1,5   | fyyr | 247 | YDAFDYWGQGTTTLTVSSGASGK   | 268 | pipn |                                                                 |
| 1527,1 | -4,7  | 6,3  | 1323,669 | -0,058 | 2 | 0,667 | eaqk | 291 | IEWHEG GTAPVK             | 302 | qtln |                                                                 |
| 1511,1 | -2,6  | 6,3  | 1323,669 | -0,041 | 2 | 0,667 | eaqk | 291 | IEWHEG GTAPVK             | 302 | qtln |                                                                 |
| 5106,1 | -1,3  | 8,07 | 1074,583 | 0,024  | 1 | 0,5   | apvk | 303 | QTLNFDLLK                 | 311 | lagd | Q303#-                                                          |
| 1112,1 | -2,5  | 8,24 | 958,448  | -0,022 | 2 | 1     | dllk | 312 | LAGDVESNPG                | 321 | ]    |                                                                 |
| 1131,1 | -2,1  | 7,94 | 958,448  | -0,068 | 2 | 1     | dllk | 312 | LAGDVESNPG                | 321 | ]    |                                                                 |
| 1097,1 | -1,8  | 7,59 | 958,448  | -0,058 | 2 | 1     | dllk | 312 | LAGDVESNPG                | 321 | ]    |                                                                 |
| 1126,1 | -1,5  | 7,95 | 958,448  | -0,046 | 1 | 1     | dllk | 312 | LAGDVESNPG                | 321 | ]    |                                                                 |

Supplementary Table 1

|        |      |      |          |        |   |        |                 |       |
|--------|------|------|----------|--------|---|--------|-----------------|-------|
| 1168,1 | -1,4 | 6,33 | 958,448  | -0,083 | 2 | 1 dIlk | 312 LAGDVESNPG  | 321 ] |
| 1152,1 | -1,1 | 7,14 | 958,448  | -0,151 | 2 | 1 dIlk | 312 LAGDVESNPG  | 321 ] |
| 1747,1 | -3,3 | 6,85 | 1055,5   | 0,017  | 2 | 1 dIlk | 312 LAGDVESNPGP | 322 ] |
| 1671,1 | -3,3 | 7,15 | 1055,5   | -0,093 | 2 | 1 dIlk | 312 LAGDVESNPGP | 322 ] |
| 1705,1 | -3,1 | 8,14 | 1055,5   | -0,083 | 2 | 1 dIlk | 312 LAGDVESNPGP | 322 ] |
| 1730,1 | -2,7 | 7,02 | 1055,5   | 1,007  | 1 | 1 dIlk | 312 LAGDVESNPGP | 322 ] |
| 1687,1 | -2,4 | 7,97 | 1055,5   | -0,223 | 2 | 1 dIlk | 312 LAGDVESNPGP | 322 ] |
| 1826,1 | -1,7 | 6,15 | 1055,5   | -0,122 | 2 | 1 dIlk | 312 LAGDVESNPGP | 322 ] |
| 1725,1 | -1,6 | 7,72 | 1055,5   | -0,131 | 2 | 1 dIlk | 312 LAGDVESNPGP | 322 ] |
| 1842,1 | -1,2 | 6,19 | 1056,484 | -0,127 | 2 | 1 dIlk | 312 LAGDVESNPGP | 322 ] |

N319#0.98402

**Supplementary Table 2A**

**Mass Spectrometry Analysis of BioID-2A\***

| rank | log(e) | log(l) | %<br>measured | %<br>corrected | unique | total | Mr    | Accession       | Description                                                                                          |
|------|--------|--------|---------------|----------------|--------|-------|-------|-----------------|------------------------------------------------------------------------------------------------------|
| 1    | -125.6 | 8.00   | 23            | 41             | 10     | 79    | 46.5  | ENSP00000347005 | LUC7L2:p , LUC7 like 2, pre-mRNA splicing factor<br>[Source:HGNC Symbol;Acc: HGNC:21608 ]            |
| 2    | -110.4 | 7.23   | 19            | 25             | 13     | 28    | 77.5  | ENSP00000325376 | HNRNPM:p , heterogeneous nuclear ribonucleoprotein M<br>[Source:HGNC Symbol;Acc: HGNC:5046 ]         |
| 3    | -105.6 | 7.36   | 28            | 42             | 11     | 32    | 49.6  | ENSP00000339001 | TUBB:p , tubulin beta class I<br>[Source:HGNC Symbol;Acc: HGNC:20778 ]                               |
| 4    | -91.0  | 7.23   | 17            | 32             | 9      | 23    | 59.3  | ENSP00000253363 | RBM39:p , RNA binding motif protein 39<br>[Source:HGNC Symbol;Acc: HGNC:15923 ]                      |
| 5    | -88.3  | 6.74   | 5.2           | 7              | 11     | 12    | 269.8 | ENSP00000344789 | ACACA:p , no protein text annotation available                                                       |
| 6    | -86.4  | 7.43   | 33            | 52             | 9      | 25    | 27.7  | ENSP00000258962 | SRSF1:p , serine and arginine rich splicing factor 1<br>[Source:HGNC Symbol;Acc: HGNC:10780 ]        |
| 7    | -83.4  | 7.53   | 7.4           | 12             | 2      | 6     | 38.4  | ENSP00000337507 | LUC7L:p , LUC7 like<br>[Source:HGNC Symbol;Acc: HGNC:6723 ]                                          |
| 8    | -75.9  | 7.87   | 37            | 71             | 8      | 26    | 19.3  | ENSP00000362820 | SRSF3:p , serine and arginine rich splicing factor 3<br>[Source:HGNC Symbol;Acc: HGNC:10785 ]        |
| 9    | -75.2  | 7.23   | 43            | 65             | 9      | 20    | 17.7  | ENSP00000393241 | RPS18:p , ribosomal protein S18<br>[Source:HGNC Symbol;Acc: HGNC:10401 ]                             |
| 10   | -71.2  | 7.16   | 3.2           | 5              | 1      | 1     | 49.6  | ENSP00000264071 | TUBB4:p , tubulin beta 4A class Iva<br>[Source:HGNC Symbol;Acc: HGNC:20774 ]                         |
| 11   | -48.1  | 7.17   | 20            | 37             | 4      | 6     | 27.4  | ENSP00000325905 | SRSF7:p , serine and arginine rich splicing factor 7<br>[Source:HGNC Symbol;Acc: HGNC:10789 ]        |
| 12   | -47.3  | 7.01   | 16            | 24             | 6      | 14    | 50.1  | ENSP00000336799 | TUBA1B:p , tubulin alpha 1b<br>[Source:HGNC Symbol;Acc: HGNC:18809 ]                                 |
| 13   | -45.9  | 6.57   | 23            | 41             | 6      | 8     | 21.4  | ENSP00000339566 | HIST1H1C:p , histone cluster 1 H1 family member c<br>[Source:HGNC Symbol;Acc: HGNC:4716 ]            |
| 14   | -45.4  | 6.64   | 18            | 32             | 5      | 10    | 23.7  | ENSP00000441406 | ADP ribosylation factor like GTPase 6 interacting protein 4<br>[Source:HGNC Symbol;Acc: HGNC:18076 ] |
| 15   | -35.8  | 6.51   | 8.7           | 16             | 1      | 1     | 21.9  | ENSP00000307705 | HIST1H1E:p , histone cluster 1 H1 family member e<br>[Source:HGNC Symbol;Acc: HGNC:4718 ]            |

Supplementary Table 2A

|    |       |      |     |    |   |    |       |                 |                                                                                                            |
|----|-------|------|-----|----|---|----|-------|-----------------|------------------------------------------------------------------------------------------------------------|
| 16 | -31.4 | 7.20 | 20  | 42 | 4 | 17 | 25.5  | ENSP00000376276 | SRSF2:p , serine and arginine rich splicing factor 2<br>[Source:HGNC Symbol;Acc: HGNC:10783 ]              |
| 17 | -29.9 | 6.57 | 7.3 | 11 | 4 | 9  | 72.3  | ENSP00000324173 | HSPA5:p , heat shock 70kDa protein 5 glucose-regulated protein, 78kDa [Source:HGNC Symbol;Acc: HGNC:5238 ] |
| 18 | -27.5 | 6.73 | 17  | 26 | 4 | 6  | 29.4  | ENSP00000272139 | C1orf35:p , chromosome 1 open reading frame 35<br>[Source:HGNC Symbol;Acc: HGNC:19032 ]                    |
| 19 | -25.1 | 6.58 | 16  | 50 | 3 | 5  | 18.8  | ENSP00000244227 | SNRNP27:p , small nuclear ribonucleoprotein U4/U6.U5 subunit 27<br>[Source:HGNC Symbol;Acc: HGNC:30240 ]   |
| 20 | -24.7 | 7.01 | 14  | 22 | 3 | 9  | 27.6  | ENSP00000343557 | ZCCHC17:p , zinc finger CCHC-type containing 17<br>[Source:HGNC Symbol;Acc: HGNC:30246 ]                   |
| 21 | -24.6 | 7.04 | 24  | 30 | 3 | 9  | 14.4  | ENSP00000422078 | SUB1:p , SUB1 homolog, transcriptional regulator<br>[Source:HGNC Symbol;Acc: HGNC:19985 ]                  |
| 22 | -24.0 | 6.54 | 23  | 31 | 4 | 6  | 16.4  | ENSP00000251453 | RPS16:p , ribosomal protein S16<br>[Source:HGNC Symbol;Acc: HGNC:10396 ]                                   |
| 23 | -22.8 | 6.62 | 17  | 35 | 3 | 7  | 22.9  | ENSP00000448039 | nascent polypeptide-associated complex alpha subunit<br>[Source:HGNC Symbol;Acc: HGNC:7629 ]               |
| 24 | -21.5 | 6.53 | 9.9 | 19 | 4 | 4  | 33.2  | ENSP00000383059 | ARGLU1:p , arginine and glutamate rich 1<br>[Source:HGNC Symbol;Acc: HGNC:25482 ]                          |
| 25 | -18.6 | 6.21 | 9.3 | 11 | 2 | 2  | 53.5  | ENSP00000404372 | HSPA8:p                                                                                                    |
| 26 | -17.4 | 6.61 | 14  | 25 | 2 | 5  | 15.8  | ENSP00000296674 | RPS23:p , ribosomal protein S23<br>[Source:HGNC Symbol;Acc: HGNC:10410 ]                                   |
| 27 | -10.6 | 5.89 | 1.8 | 3  | 2 | 2  | 117.4 | ENSP00000416534 | DDX46:p                                                                                                    |
| 28 | -9.6  | 6.00 | 5.6 | 8  | 2 | 2  | 49.2  | ENSP00000377082 | HNRNPH1:p , heterogeneous nuclear ribonucleoprotein H1<br>[Source:HGNC Symbol;Acc: HGNC:5041 ]             |
| 29 | -9.6  | 5.94 | 8.1 | 13 | 2 | 2  | 26.1  | ENSP00000297157 | RP9:p , RP9, pre-mRNA splicing factor<br>[Source:HGNC Symbol;Acc: HGNC:10288 ]                             |
| 30 | -9.6  | 5.82 | 7.0 | 8  | 2 | 2  | 32.7  | ENSP00000435905 | PC:p                                                                                                       |
| 31 | -9.2  | 5.62 | 20  | 34 | 2 | 2  | 14.8  | ENSP00000346088 | RPL22:p , ribosomal protein L22<br>[Source:HGNC Symbol;Acc: HGNC:10315 ]                                   |
| 32 | -8.6  | 5.79 | 3.0 | 4  | 2 | 2  | 80.4  | ENSP00000265594 | MCCC1:p , methylcrotonoyl-CoA carboxylase 1 (alpha)<br>[ Source: HGNC 6936 ]                               |
| 33 | -8.6  | 5.76 | 8.7 | 14 | 2 | 2  | 37.5  | ENSP00000305556 | PCBP1:p , poly(rC) binding protein 1<br>[ Source: HGNC 8647 ]                                              |
| 34 | -8.6  | 6.25 | 2.4 | 3  | 2 | 2  | 163.0 | ENSP00000397570 | MAPKBP1:p                                                                                                  |



Supplementary Table 2A

|    |      |      |     |    |   |   |       |                 |                                                                                               |
|----|------|------|-----|----|---|---|-------|-----------------|-----------------------------------------------------------------------------------------------|
| 35 | -7.9 | 6.34 | 6.4 | 17 | 2 | 3 | 28.7  | ENSP00000369757 | RPS6:p , ribosomal protein S6<br>[Source:HGNC Symbol;Acc: HGNC:10429 ]                        |
| 36 | -7.1 | 5.96 | 12  | 29 | 2 | 2 | 13.7  | ENSP00000435096 | RPS25:p , ribosomal protein S25<br>[Source:HGNC Symbol;Acc: HGNC:10413 ]                      |
| 37 | -6.7 | 6.06 | 5.0 | 8  | 1 | 2 | 27.9  | ENSP00000291552 | U2AF1:p , U2 small nuclear RNA auxiliary factor 1<br>[Source:HGNC Symbol;Acc: HGNC:12453 ]    |
| 38 | -5.4 | 5.91 | 14  | 18 | 1 | 2 | 9.5   | ENSP00000357555 | RPS27:p , ribosomal protein S27<br>[Source:HGNC Symbol;Acc: HGNC:10416 ]                      |
| 39 | -4.9 | 6.53 | 9.4 | 21 | 1 | 3 | 10.6  | ENSP00000362671 | RPL35:p , ribosomal protein L35<br>[Source:HGNC Symbol;Acc: HGNC:10344 ]                      |
| 40 | -4.6 | 5.60 | 2.3 | 4  | 1 | 1 | 47.7  | ENSP00000311430 | RPL4:p , ribosomal protein L4<br>[Source:HGNC Symbol;Acc: HGNC:10353 ]                        |
| 41 | -4.0 | 6.26 | 6.3 | 10 | 1 | 2 | 16.4  | ENSP00000404375 | RPL36A:p , ribosomal protein L36a<br>[Source:HGNC Symbol;Acc: HGNC:10359 ]                    |
| 42 | -3.8 | 5.60 | 0.6 | 1  | 1 | 1 | 269.3 | ENSP00000354085 | ANKHD1:p , ankyrin repeat and KH domain containing 1<br>[Source:HGNC Symbol;Acc: HGNC:24714 ] |
| 43 | -3.7 | 5.47 | 5.2 | 11 | 1 | 2 | 33.6  | ENSP00000416959 | TRA2B:p , transformer 2 beta homolog<br>[Source:HGNC Symbol;Acc: HGNC:10781 ]                 |
| 44 | -3.6 | 5.51 | 12  | 22 | 1 | 1 | 13.0  | ENSP00000348849 | RPS26:p , ribosomal protein S26<br>[Source:HGNC Symbol;Acc: HGNC:10414 ]                      |
| 45 | -3.5 | 6.58 | 6.8 | 14 | 1 | 3 | 16.6  | ENSP00000346015 | RPL27A:p , ribosomal protein L27a<br>[Source:HGNC Symbol;Acc: HGNC:10329 ]                    |
| 46 | -3.5 | 5.51 | 6.6 | 22 | 1 | 1 | 16.3  | ENSP00000385958 | RPS14:p , ribosomal protein S14<br>[Source:HGNC Symbol;Acc: HGNC:10387 ]                      |
| 47 | -3.1 | 6.83 | 2.6 | 3  | 1 | 4 | 74.8  | ENSP00000305107 | GIMAP8:p , GTPase, IMAP family member 8<br>[Source:HGNC Symbol;Acc: HGNC:21792 ]              |
| 48 | -3.1 | 6.02 | 6.4 | 8  | 1 | 1 | 14.9  | ENSP00000420311 | RPL23:p , ribosomal protein L23<br>[Source:HGNC Symbol;Acc: HGNC:10316 ]                      |
| 49 | -2.9 | 5.72 | 6.6 | 12 | 1 | 1 | 12.5  | ENSP00000346012 | RPL36AL:p , ribosomal protein L36a like<br>[Source:HGNC Symbol;Acc: HGNC:10346 ]              |
| 50 | -2.7 | 5.32 | 3.9 | 8  | 1 | 2 | 51.4  | ENSP00000425092 | LUC7L3:p , LUC7 like 3 pre-mRNA splicing factor<br>[Source:HGNC Symbol;Acc: HGNC:24309 ]      |
| 51 | -2.5 | 6.00 | 33  | 44 | 1 | 1 | 2.2   | ENSP00000451870 | T-cell receptor alpha joining 56<br>[Source:HGNC Symbol;Acc: HGNC:12088 ]                     |
| 52 | -2.5 | 6.22 | 5.5 | 10 | 1 | 3 | 22.2  | ENSP00000342913 | SRSF10:p                                                                                      |
| 53 | -2.4 | 7.05 | 3.0 | 4  | 1 | 6 | 24.4  | sp TRYP_PIG     | Trypsin; EC 3.4.21.4; Flags: Precursor                                                        |

Supplementary Table 2A

|    |      |      |     |    |   |   |       |                 |                                                                                            |
|----|------|------|-----|----|---|---|-------|-----------------|--------------------------------------------------------------------------------------------|
| 54 | -2.3 | 5.06 | 7.1 | 15 | 1 | 1 | 18.2  | ENSP00000427401 | SREK11P1:p                                                                                 |
| 55 | -2.2 | 5.52 | 14  | 17 | 1 | 1 | 10.5  | ENSP00000215570 | TIMM13:p                                                                                   |
| 56 | -2.1 | 5.54 | 0.8 | 3  | 1 | 1 | 161.0 | ENSP00000420477 | NACAD:p                                                                                    |
| 57 | -2.1 | 5.89 | 4.5 | 9  | 1 | 1 | 17.8  | ENSP00000377640 | RPL24:p , ribosomal protein L24<br>[Source:HGNC Symbol;Acc: HGNC:10325 ]                   |
| 58 | -1.9 | 5.52 | 2.7 | 5  | 1 | 1 | 72.9  | ENSP00000356311 | C1orf106:p                                                                                 |
| 59 | -1.9 | 5.39 | 1.4 | 4  | 1 | 1 | 103.9 | ENSP00000345308 | UBAP2L:p , ubiquitin associated protein 2 like<br>[Source:HGNC Symbol;Acc: HGNC:29877 ]    |
| 60 | -1.8 | 5.36 | 0.8 | 1  | 1 | 1 | 160.5 | ENSP00000364979 | COL4A1:p                                                                                   |
| 61 | -1.7 | 5.65 | 3.8 | 7  | 1 | 1 | 27.2  | ENSP00000389783 | FAM133B:p                                                                                  |
| 62 | -1.7 | 5.60 | 4.1 | 6  | 1 | 1 | 33.0  | ENSP00000393746 | FYTTD1:p                                                                                   |
| 63 | -1.6 | 5.61 | 12  | 21 | 1 | 1 | 6.7   | ENSP00000245458 | RPS29:p , ribosomal protein S29<br>[Source:HGNC Symbol;Acc: HGNC:10419 ]                   |
| 64 | -1.6 | 4.64 | 0.8 | 1  | 1 | 1 | 141.3 | ENSP00000347730 | ZNF536:p                                                                                   |
| 65 | -1.5 | 5.38 | 0.5 | 1  | 1 | 1 | 170.8 | ENSP00000342434 | BAZ1B:p                                                                                    |
| 66 | -1.5 | 5.45 | 6.5 | 13 | 1 | 1 | 17.7  | ENSP00000366061 | NMS:p                                                                                      |
| 67 | -1.5 | 6.01 | 0.5 | 1  | 1 | 1 | 150.7 | ENSP00000303427 | PDS5A:p                                                                                    |
| 68 | -1.5 | 5.52 | 1.8 | 3  | 1 | 1 | 116.6 | ENSP00000382356 | COL28A1:p                                                                                  |
| 69 | -1.4 | 5.31 | 1.1 | 2  | 1 | 1 | 110.6 | ENSP00000353854 | C15orf39:p                                                                                 |
| 70 | -1.4 | 5.54 | 1.5 | 3  | 1 | 2 | 53.5  | ENSP00000307863 | U2AF2:p , U2 small nuclear RNA auxiliary factor 2<br>[Source:HGNC Symbol;Acc: HGNC:23156 ] |
| 71 | -1.4 | 5.60 | 4.8 | 7  | 1 | 1 | 54.2  | ENSP00000359160 | CCDC76:p                                                                                   |
| 72 | -1.4 | 5.74 | 0.2 | 0  | 1 | 1 | 383.6 | ENSP00000334714 | IGFN1:p                                                                                    |

Supplementary Table 2A

|    |      |      |     |    |   |   |       |                 |                                                                            |
|----|------|------|-----|----|---|---|-------|-----------------|----------------------------------------------------------------------------|
| 73 | -1.4 | 5.38 | 4.1 | 11 | 1 | 1 | 23.5  | ENSP00000225430 | RPL19:p , ribosomal protein L19<br>[Source:HGNC Symbol;Acc: HGNC:10312 ]   |
| 74 | -1.4 | 5.40 | 9.5 | 15 | 1 | 1 | 11.8  | ENSP00000447415 | no protein information available                                           |
| 75 | -1.3 | 6.12 | 0.3 | 0  | 1 | 1 | 348.2 | ENSP00000424243 | EYS:p                                                                      |
| 76 | -1.3 | 5.74 | 4.2 | 7  | 1 | 1 | 25.5  | ENSP00000385298 | MEI1:p                                                                     |
| 77 | -1.3 | 5.34 | 1.8 | 2  | 1 | 1 | 163.9 | ENSP00000379866 | COL4A4:p , collagen, type IV, alpha 4<br>[Source: HGNC 2206 ]              |
| 78 | -1.3 | 5.58 | 2.2 | 3  | 1 | 1 | 101.9 | ENSP00000432728 | TYK2:p                                                                     |
| 79 | -1.3 | 5.55 | 3.5 | 5  | 1 | 1 | 54.4  | ENSP00000260228 | MMP20:p                                                                    |
| 80 | -1.3 | 5.67 | 1.1 | 1  | 1 | 1 | 112.8 | ENSP00000367787 | LIG3:p                                                                     |
| 81 | -1.3 | 5.45 | 12  | 31 | 1 | 1 | 23.6  | ENSP00000242284 | CLTA:p                                                                     |
| 82 | -1.2 | 5.27 | 1.9 | 4  | 1 | 1 | 69.8  | ENSP00000347451 | LINGO1:p                                                                   |
| 83 | -1.2 | 5.90 | 1.3 | 2  | 1 | 1 | 157.0 | ENSP00000270238 | LMTK3:p                                                                    |
| 84 | -1.2 | 5.53 | 3.2 | 5  | 1 | 1 | 24.4  | ENSP00000446215 | RAN, member RAS oncogene family<br>[Source:HGNC Symbol;Acc: HGNC:9846 ]    |
| 85 | -1.2 | 5.58 | 18  | 90 | 1 | 1 | 6.4   | ENSP00000355315 | RPL39:p                                                                    |
| 86 | -1.2 | 5.76 | 0.8 | 1  | 1 | 1 | 119.5 | ENSP00000317614 | ZNF518B:p                                                                  |
| 87 | -1.2 | 5.32 | 1.9 | 3  | 1 | 1 | 67.8  | ENSP00000359916 | FRMD7:p                                                                    |
| 88 | -1.2 | 6.00 | 0.4 | 1  | 1 | 1 | 237.9 | ENSP00000276204 | DOCK11:p                                                                   |
| 89 | -1.2 | 5.89 | 4.6 | 6  | 1 | 1 | 45.1  | ENSP00000384848 | PRR5:p                                                                     |
| 90 | -1.2 | 5.70 | 5.1 | 7  | 1 | 1 | 18.0  | ENSP00000383981 | RPS27A:p , ribosomal protein S27a<br>[Source:HGNC Symbol;Acc: HGNC:10417 ] |
| 91 | -1.1 | 4.84 | 12  | 15 | 1 | 1 | 16.1  | ENSP00000454239 | no protein information available                                           |

Supplementary Table 2A

|     |      |      |     |    |   |   |       |                 |                                                                                       |
|-----|------|------|-----|----|---|---|-------|-----------------|---------------------------------------------------------------------------------------|
| 92  | -1.1 | 5.35 | 0.2 | 0  | 1 | 1 | 256.1 | ENSP00000418510 | FLNB:p                                                                                |
| 93  | -1.1 | 5.16 | 17  | 20 | 1 | 1 | 9.7   | ENSP00000334644 | LCE3C:p                                                                               |
| 94  | -1.1 | 5.35 | 2.3 | 4  | 1 | 1 | 67.6  | ENSP00000217429 | FAM83D:p                                                                              |
| 95  | -1.1 | 5.27 | 2.4 | 5  | 1 | 1 | 27.0  | ENSP00000456266 | no protein information available                                                      |
| 96  | -1.1 | 5.59 | 1.1 | 2  | 1 | 1 | 96.6  | ENSP00000413812 | ERN2:p                                                                                |
| 97  | -1.1 | 5.50 | 2.7 | 4  | 1 | 1 | 34.6  | ENSP00000354822 | XAF1:p                                                                                |
| 98  | -1.1 | 5.70 | 1.3 | 2  | 1 | 1 | 138.0 | ENSP00000364798 | ZBTB40:p                                                                              |
| 99  | -1.1 | 5.86 | 0.9 | 1  | 1 | 1 | 161.0 | ENSP00000303153 | COL22A1:p , collagen type XXII alpha 1 chain<br>[Source:HGNC Symbol;Acc: HGNC:22989 ] |
| 100 | -1.0 | 5.59 | 2.7 | 4  | 1 | 1 | 46.9  | ENSP00000272224 | GDF7:p                                                                                |
| 101 | -1.0 | 6.23 | 1.2 | 2  | 1 | 1 | 89.7  | ENSP00000206765 | TGM1:p                                                                                |
| 102 | -1.0 | 5.59 | 0.9 | 1  | 1 | 1 | 127.7 | ENSP00000268296 | ITGAX:p                                                                               |
| 103 | -1.0 | 5.17 | 0.6 | 1  | 1 | 1 | 222.9 | ENSP00000262450 | CHD5:p                                                                                |

**Supplementary Table 2B**

**Mass Spectrometry Analysis of BioID-2A-P\***

| rank | log(e) | log(l) | % measured | % corrected | unique | total | Mr    | Accession       | Description                                                                                   |
|------|--------|--------|------------|-------------|--------|-------|-------|-----------------|-----------------------------------------------------------------------------------------------|
| 1    | -129.6 | 8.02   | 23         | 41          | 10     | 63    | 46.5  | ENSP00000347005 | LUC7L2:p , LUC7 like 2, pre-mRNA splicing factor<br>[Source:HGNC Symbol;Acc: HGNC:21608 ]     |
| 2    | -111.9 | 7.19   | 18         | 23          | 12     | 19    | 77.5  | ENSP00000325376 | HNRNPM:p , heterogeneous nuclear ribonucleoprotein M<br>[Source:HGNC Symbol;Acc: HGNC:5046 ]  |
| 3    | -88.0  | 7.62   | 7.4        | 12          | 2      | 5     | 38.4  | ENSP00000337507 | LUC7L:p , LUC7 like<br>[Source:HGNC Symbol;Acc: HGNC:6723 ]                                   |
| 4    | -83.6  | 7.30   | 23         | 35          | 9      | 24    | 49.6  | ENSP00000339001 | TUBB:p , tubulin beta class I<br>[Source:HGNC Symbol;Acc: HGNC:20778 ]                        |
| 5    | -82.6  | 7.64   | 36         | 57          | 9      | 30    | 27.7  | ENSP00000258962 | SRSF1:p , serine and arginine rich splicing factor 1<br>[Source:HGNC Symbol;Acc: HGNC:10780 ] |
| 6    | -74.8  | 7.15   | 9.9        | 15          | 3      | 7     | 49.6  | ENSP00000264071 | TUBB4:p , tubulin beta 4A class IVa<br>[Source:HGNC Symbol;Acc: HGNC:20774 ]                  |
| 7    | -74.0  | 7.19   | 2.5        | 4           | 1      | 1     | 49.8  | ENSP00000341289 | TUBB2C:p , tubulin beta 4B class Ivb<br>[Source:HGNC Symbol;Acc: HGNC:20771 ]                 |
| 8    | -73.5  | 7.31   | 14         | 26          | 6      | 15    | 59.3  | ENSP00000253363 | RBM39:p , RNA binding motif protein 39<br>[Source:HGNC Symbol;Acc: HGNC:15923 ]               |
| 9    | -60.3  | 8.11   | 34         | 65          | 6      | 34    | 19.3  | ENSP00000362820 | SRSF3:p , serine and arginine rich splicing factor 3<br>[Source:HGNC Symbol;Acc: HGNC:10785 ] |
| 10   | -56.2  | 6.67   | 3.6        | 5           | 8      | 9     | 269.8 | ENSP00000344789 | ACACA:p , no protein text annotation available                                                |
| 11   | -52.0  | 7.14   | 30         | 46          | 6      | 13    | 17.7  | ENSP00000393241 | RPS18:p , ribosomal protein S18<br>[Source:HGNC Symbol;Acc: HGNC:10401 ]                      |
| 12   | -49.7  | 7.20   | 16         | 24          | 6      | 14    | 50.1  | ENSP00000336799 | TUBA1B:p , tubulin alpha 1b<br>[Source:HGNC Symbol;Acc: HGNC:18809 ]                          |
| 13   | -36.3  | 7.47   | 11         | 21          | 3      | 4     | 27.4  | ENSP00000325905 | SRSF7:p , serine and arginine rich splicing factor 7<br>[Source:HGNC Symbol;Acc: HGNC:10789 ] |
| 14   | -32.2  | 7.11   | 14         | 22          | 3      | 10    | 27.6  | ENSP00000343557 | ZCCHC17:p , zinc finger CCHC-type containing 17<br>[Source:HGNC Symbol;Acc: HGNC:30246 ]      |
| 15   | -31.8  | 6.56   | 19         | 28          | 4      | 5     | 29.4  | ENSP00000272139 | C1orf35:p , chromosome 1 open reading frame 35<br>[Source:HGNC Symbol;Acc: HGNC:19032 ]       |

Supplementary Table 2B

|    |       |      |     |    |   |    |       |                 |                                                                                                          |
|----|-------|------|-----|----|---|----|-------|-----------------|----------------------------------------------------------------------------------------------------------|
| 16 | -29.9 | 6.80 | 22  | 40 | 4 | 7  | 21.9  | ENSP00000307705 | HIST1H1E:p , histone cluster 1 H1 family member e<br>[Source:HGNC Symbol;Acc: HGNC:4718 ]                |
| 17 | -29.1 | 7.39 | 17  | 36 | 3 | 22 | 25.5  | ENSP00000376276 | SRSF2:p , serine and arginine rich splicing factor 2<br>[Source:HGNC Symbol;Acc: HGNC:10783 ]            |
| 18 | -28.9 | 6.79 | 7.0 | 12 | 1 | 2  | 21.4  | ENSP00000339566 | HIST1H1C:p , histone cluster 1 H1 family member c<br>[Source:HGNC Symbol;Acc: HGNC:4716 ]                |
| 19 | -27.9 | 6.49 | 21  | 38 | 4 | 5  | 12.5  | ENSP00000346012 | RPL36AL:p , ribosomal protein L36a like<br>[Source:HGNC Symbol;Acc: HGNC:10346 ]                         |
| 20 | -27.1 | 6.81 | 6.3 | 10 | 2 | 5  | 16.4  | ENSP00000404375 | RPL36A:p , ribosomal protein L36a<br>[Source:HGNC Symbol;Acc: HGNC:10359 ]                               |
| 21 | -26.6 | 6.27 | 9.0 | 10 | 3 | 3  | 42.0  | ENSP00000355645 | ACTA1:p , actin, alpha 1, skeletal muscle<br>[Source:HGNC Symbol;Acc: HGNC:129 ]                         |
| 22 | -26.1 | 6.44 | 16  | 28 | 3 | 4  | 23.7  | ENSP00000441406 | ADP ribosylation factor like GTPase 6 interacting protein 4<br>[Source:HGNC Symbol;Acc: HGNC:18076 ]     |
| 23 | -26.1 | 7.00 | 16  | 50 | 3 | 7  | 18.8  | ENSP00000244227 | SNRNP27:p , small nuclear ribonucleoprotein U4/U6.U5 subunit<br>27 [Source:HGNC Symbol;Acc: HGNC:30240 ] |
| 24 | -23.8 | 6.73 | 16  | 45 | 4 | 6  | 28.7  | ENSP00000369757 | RPS6:p , ribosomal protein S6<br>[Source:HGNC Symbol;Acc: HGNC:10429 ]                                   |
| 25 | -23.4 | 6.58 | 21  | 38 | 3 | 4  | 15.8  | ENSP00000296674 | RPS23:p , ribosomal protein S23<br>[Source:HGNC Symbol;Acc: HGNC:10410 ]                                 |
| 26 | -22.8 | 6.23 | 7.3 | 11 | 3 | 3  | 49.2  | ENSP00000377082 | HNRNPH1:p , heterogeneous nuclear ribonucleoprotein H1<br>[Source:HGNC Symbol;Acc: HGNC:5041 ]           |
| 27 | -22.5 | 7.02 | 24  | 30 | 3 | 8  | 14.4  | ENSP00000422078 | SUB1:p , SUB1 homolog, transcriptional regulator<br>[Source:HGNC Symbol;Acc: HGNC:19985 ]                |
| 28 | -15.8 | 6.08 | 3.0 | 4  | 3 | 3  | 163.7 | ENSP00000361290 | COL4A6:p , collagen type IV alpha 6 chain<br>[Source:HGNC Symbol;Acc: HGNC:2208 ]                        |
| 29 | -15.3 | 6.65 | 7.3 | 14 | 3 | 3  | 33.2  | ENSP00000383059 | ARGLU1:p , arginine and glutamate rich 1<br>[Source:HGNC Symbol;Acc: HGNC:25482 ]                        |
| 30 | -15.3 | 6.04 | 11  | 19 | 3 | 3  | 34.9  | ENSP00000352228 | PCBP2:p , poly(rC) binding protein 2<br>[Source:HGNC Symbol;Acc: HGNC:8648 ]                             |
| 31 | -13.4 | 6.46 | 13  | 27 | 2 | 2  | 16.6  | ENSP00000346015 | RPL27A:p , ribosomal protein L27a<br>[Source:HGNC Symbol;Acc: HGNC:10329 ]                               |
| 32 | -10.9 | 6.50 | 12  | 16 | 2 | 3  | 16.4  | ENSP00000251453 | RPS16:p , ribosomal protein S16<br>[Source:HGNC Symbol;Acc: HGNC:10396 ]                                 |
| 33 | -10.7 | 5.90 | 8.5 | 14 | 2 | 2  | 24.2  | ENSP00000307889 | RPL13:p , ribosomal protein L13<br>[Source:HGNC Symbol;Acc: HGNC:10303 ]                                 |
| 34 | -10.1 | 5.99 | 8.0 | 17 | 2 | 3  | 33.6  | ENSP00000416959 | TRA2B:p , transformer 2 beta homolog<br>[Source:HGNC Symbol;Acc: HGNC:10781 ]                            |

Supplementary Table 2B

|    |      |      |     |    |   |   |      |                 |                                                                                                          |
|----|------|------|-----|----|---|---|------|-----------------|----------------------------------------------------------------------------------------------------------|
| 35 | -9.7 | 6.00 | 7.7 | 14 | 2 | 2 | 28.4 | ENSP00000398401 | FAM133B:p , family with sequence similarity 133 member B<br>[Source:HGNC Symbol;Acc: HGNC:28629 ]        |
| 36 | -9.1 | 6.16 | 19  | 34 | 2 | 2 | 13.0 | ENSP00000348849 | RPS26:p , ribosomal protein S26<br>[Source:HGNC Symbol;Acc: HGNC:10414 ]                                 |
| 37 | -8.9 | 6.40 | 12  | 25 | 2 | 3 | 17.8 | ENSP00000377640 | RPL24:p , ribosomal protein L24<br>[Source:HGNC Symbol;Acc: HGNC:10325 ]                                 |
| 38 | -8.7 | 6.12 | 4.5 | 7  | 2 | 2 | 26.1 | ENSP00000297157 | RP9:p , RP9, pre-mRNA splicing factor<br>[Source:HGNC Symbol;Acc: HGNC:10288 ]                           |
| 39 | -8.5 | 7.09 | 4.4 | 6  | 2 | 2 | 70.0 | ENSP00000364802 | HSPA1A:p , heat shock protein family A (Hsp70) member 1A<br>[Source:HGNC Symbol;Acc: HGNC:5232 ]         |
| 40 | -8.2 | 6.10 | 3.6 | 5  | 2 | 2 | 61.3 | ENSP00000343657 | MCCC2:p , methylcrotonoyl-CoA carboxylase 2<br>[Source:HGNC Symbol;Acc: HGNC:6937 ]                      |
| 41 | -5.5 | 5.81 | 2.3 | 4  | 1 | 1 | 47.7 | ENSP00000311430 | RPL4:p , ribosomal protein L4<br>[Source:HGNC Symbol;Acc: HGNC:10353 ]                                   |
| 42 | -5.2 | 5.88 | 9.6 | 11 | 1 | 1 | 12.3 | ENSP00000451080 | ERH, mRNA splicing and mitosis factor<br>[Source:HGNC Symbol;Acc: HGNC:3447 ]                            |
| 43 | -4.8 | 5.68 | 4.1 | 11 | 1 | 1 | 23.5 | ENSP00000225430 | RPL19:p , ribosomal protein L19<br>[Source:HGNC Symbol;Acc: HGNC:10312 ]                                 |
| 44 | -4.6 | 5.80 | 1.5 | 2  | 1 | 2 | 83.2 | ENSP00000360709 | HSP90AB1:p , heat shock protein 90 alpha family class B member 1<br>[Source:HGNC Symbol;Acc: HGNC:5258 ] |
| 45 | -4.5 | 4.96 | 3.9 | 8  | 1 | 1 | 51.4 | ENSP00000425092 | LUC7L3:p , LUC7 like 3 pre-mRNA splicing factor<br>[Source:HGNC Symbol;Acc: HGNC:24309 ]                 |
| 46 | -4.4 | 4.99 | 3.9 | 6  | 1 | 1 | 42.4 | ENSP00000360033 | SERBP1:p , SERPINE1 mRNA binding protein 1<br>[Source:HGNC Symbol;Acc: HGNC:17860 ]                      |
| 47 | -4.4 | 5.79 | 4.6 | 8  | 1 | 2 | 34.2 | ENSP00000380275 | RNPS1:p , RNA binding protein with serine rich domain 1<br>[Source:HGNC Symbol;Acc: HGNC:10080 ]         |
| 48 | -3.6 | 5.94 | 5.1 | 7  | 1 | 2 | 18.0 | ENSP00000383981 | RPS27A:p , ribosomal protein S27a<br>[Source:HGNC Symbol;Acc: HGNC:10417 ]                               |
| 49 | -3.5 | 5.95 | 1.8 | 3  | 1 | 1 | 69.1 | ENSP00000440276 | DEAD-box helicase 5<br>[Source:HGNC Symbol;Acc: HGNC:2746 ]                                              |
| 50 | -3.3 | 5.72 | 12  | 21 | 1 | 1 | 6.7  | ENSP00000245458 | RPS29:p , ribosomal protein S29<br>[Source:HGNC Symbol;Acc: HGNC:10419 ]                                 |
| 51 | -3.2 | 6.21 | 14  | 18 | 1 | 3 | 9.5  | ENSP00000357555 | RPS27:p , ribosomal protein S27<br>[Source:HGNC Symbol;Acc: HGNC:10416 ]                                 |
| 52 | -3.1 | 6.76 | 9.4 | 21 | 1 | 4 | 10.6 | ENSP00000362671 | RPL35:p , ribosomal protein L35<br>[Source:HGNC Symbol;Acc: HGNC:10344 ]                                 |
| 53 | -2.8 | 5.27 | 5.0 | 8  | 1 | 1 | 27.9 | ENSP00000291552 | U2AF1:p , U2 small nuclear RNA auxiliary factor 1<br>[Source:HGNC Symbol;Acc: HGNC:12453 ]               |

Supplementary Table 2B

|    |      |      |     |    |   |   |       |                 |                                                                                                       |
|----|------|------|-----|----|---|---|-------|-----------------|-------------------------------------------------------------------------------------------------------|
| 54 | -2.7 | 5.92 | 5.4 | 7  | 1 | 1 | 16.7  | ENSP00000228140 | RPS13:p , ribosomal protein S13<br>[Source:HGNC Symbol;Acc: HGNC:10386 ]                              |
| 55 | -2.5 | 7.12 | 3.0 | 4  | 1 | 6 | 24.4  | sp TRYP_PIG     | Trypsin; EC 3.4.21.4; Flags: Precursor                                                                |
| 56 | -2.3 | 5.51 | 1.8 | 2  | 1 | 1 | 80.0  | ENSP00000365462 | PCCA:p , propionyl-CoA carboxylase alpha subunit<br>[Source:HGNC Symbol;Acc: HGNC:8653 ]              |
| 57 | -2.3 | 5.52 | 1.4 | 4  | 1 | 1 | 103.9 | ENSP00000345308 | UBAP2L:p , ubiquitin associated protein 2 like<br>[Source:HGNC Symbol;Acc: HGNC:29877 ]               |
| 58 | -2.2 | 6.23 | 6.4 | 8  | 1 | 1 | 14.9  | ENSP00000420311 | RPL23:p , ribosomal protein L23<br>[Source:HGNC Symbol;Acc: HGNC:10316 ]                              |
| 59 | -2.1 | 6.05 | 33  | 44 | 1 | 1 | 2.2   | ENSP00000451870 | T-cell receptor alpha joining 56<br>[Source:HGNC Symbol;Acc: HGNC:12088 ]                             |
| 60 | -2.1 | 5.47 | 2.2 | 3  | 1 | 1 | 80.6  | ENSP00000362929 | GSN:p , gelsolin<br>[Source:HGNC Symbol;Acc: HGNC:4620 ]                                              |
| 61 | -2.0 | 5.45 | 0.7 | 1  | 1 | 1 | 211.0 | ENSP00000356000 | PLXNA2:p , plexin A2<br>[Source:HGNC Symbol;Acc: HGNC:9100 ]                                          |
| 62 | -1.9 | 5.46 | 9.4 | 16 | 1 | 1 | 14.8  | ENSP00000346088 | RPL22:p , ribosomal protein L22<br>[Source:HGNC Symbol;Acc: HGNC:10315 ]                              |
| 63 | -1.9 | 5.64 | 5.5 | 10 | 1 | 1 | 22.2  | ENSP00000342913 | SRSF10:p                                                                                              |
| 64 | -1.9 | 6.07 | 1.7 | 3  | 1 | 1 | 50.1  | ENSP00000339063 | EEF1A1:p , eukaryotic translation elongation factor 1 alpha 1<br>[Source:HGNC Symbol;Acc: HGNC:3189 ] |
| 65 | -1.9 | 5.91 | 1.5 | 2  | 1 | 1 | 99.5  | ENSP00000393313 | EPS15L1:p                                                                                             |
| 66 | -1.9 | 5.57 | 1.9 | 2  | 1 | 1 | 58.9  | ENSP00000263284 | CCDC61:p                                                                                              |
| 67 | -1.9 | 6.29 | 6.8 | 18 | 1 | 1 | 14.4  | ENSP00000435370 | FAU:p , FAU, ubiquitin like and ribosomal protein S30 fusion<br>[Source:HGNC Symbol;Acc: HGNC:3597 ]  |
| 68 | -1.8 | 5.06 | 14  | 24 | 1 | 1 | 13.7  | ENSP00000437206 | ST3GAL3:p                                                                                             |
| 69 | -1.8 | 5.84 | 7.5 | 12 | 1 | 1 | 16.3  | ENSP00000271843 | JTB:p                                                                                                 |
| 70 | -1.7 | 6.16 | 3.2 | 5  | 1 | 1 | 68.8  | ENSP00000263663 | TAF1B:p                                                                                               |
| 71 | -1.7 | 6.16 | 0.3 | 0  | 1 | 1 | 293.3 | ENSP00000222270 | Histone-lysine N-methyltransferase 2B                                                                 |
| 72 | -1.7 | 5.64 | 1.1 | 2  | 1 | 1 | 131.8 | ENSP00000384169 | FBLN2:p                                                                                               |



Supplementary Table 2B

|    |      |      |     |    |   |   |       |                 |                                                                                               |
|----|------|------|-----|----|---|---|-------|-----------------|-----------------------------------------------------------------------------------------------|
| 73 | -1.7 | 5.73 | 5.3 | 10 | 1 | 1 | 30.3  | ENSP00000358731 | ADORA3:p                                                                                      |
| 74 | -1.6 | 5.38 | 0.7 | 1  | 1 | 1 | 242.8 | ENSP00000363215 | MED12:p                                                                                       |
| 75 | -1.5 | 5.39 | 1.4 | 2  | 1 | 1 | 127.9 | ENSP00000364973 | COL4A1:p                                                                                      |
| 76 | -1.5 | 5.29 | 0.6 | 1  | 1 | 1 | 269.3 | ENSP00000354085 | ANKHD1:p , ankyrin repeat and KH domain containing 1<br>[Source:HGNC Symbol;Acc: HGNC:24714 ] |
| 77 | -1.5 | 5.51 | 4.8 | 12 | 1 | 1 | 13.7  | ENSP00000435096 | RPS25:p , ribosomal protein S25<br>[Source:HGNC Symbol;Acc: HGNC:10413 ]                      |
| 78 | -1.4 | 5.39 | 22  | 29 | 1 | 1 | 14.6  | ENSP00000414803 | LASP1:p                                                                                       |
| 79 | -1.4 | 5.74 | 6.0 | 11 | 1 | 1 | 17.0  | ENSP00000268483 | TXNL4B:p                                                                                      |
| 80 | -1.4 | 6.41 | 3.1 | 4  | 1 | 1 | 61.6  | ENSP00000276211 | ARHGAP36:p                                                                                    |
| 81 | -1.4 | 5.59 | 1.0 | 1  | 1 | 1 | 136.7 | ENSP00000264229 | KIAA1211:p                                                                                    |
| 82 | -1.4 | 5.82 | 6.5 | 12 | 1 | 1 | 21.6  | ENSP00000342156 | NCR3:p                                                                                        |
| 83 | -1.4 | 5.84 | 6.1 | 10 | 1 | 1 | 31.9  | ENSP00000397385 | DALRD3:p                                                                                      |
| 84 | -1.4 | 5.85 | 3.7 | 6  | 1 | 1 | 75.0  | ENSP00000318429 | CCDC114:p                                                                                     |
| 85 | -1.4 | 5.28 | 2.8 | 4  | 1 | 1 | 58.2  | ENSP00000251654 | PCCB:p , propionyl CoA carboxylase, beta polypeptide<br>[Source: HGNC 8654 ]                  |
| 86 | -1.3 | 5.46 | 1.9 | 3  | 1 | 1 | 71.6  | ENSP00000380557 | AKAP8L:p                                                                                      |
| 87 | -1.3 | 5.48 | 0.9 | 1  | 1 | 1 | 295.0 | ENSP00000332371 | COL7A1:p , collagen type VII alpha 1 chain<br>[Source:HGNC Symbol;Acc: HGNC:2214 ]            |
| 88 | -1.3 | 5.51 | 0.7 | 1  | 1 | 1 | 222.1 | ENSP00000383303 | DSCAM:p                                                                                       |
| 89 | -1.3 | 4.25 | 2.2 | 4  | 1 | 1 | 73.0  | ENSP00000348959 | MAN1A2:p                                                                                      |
| 90 | -1.3 | 5.51 | 2.4 | 4  | 1 | 1 | 62.0  | ENSP00000246662 | KRT9:p , keratin 9<br>[Source:HGNC Symbol;Acc: HGNC:6447 ]                                    |
| 91 | -1.3 | 5.33 | 0.9 | 2  | 1 | 1 | 116.9 | ENSP00000265069 | ZFR:p                                                                                         |

Supplementary Table 2B

|     |      |      |     |    |   |   |       |                 |                                                                                  |
|-----|------|------|-----|----|---|---|-------|-----------------|----------------------------------------------------------------------------------|
| 92  | -1.2 | 5.63 | 1.0 | 2  | 1 | 1 | 160.5 | ENSP00000323720 | MED14:p                                                                          |
| 93  | -1.2 | 5.97 | 2.4 | 4  | 1 | 1 | 82.8  | ENSP00000410846 | XPO5:p                                                                           |
| 94  | -1.2 | 5.48 | 5.1 | 6  | 1 | 1 | 40.5  | ENSP00000393189 | EFCAB8:p                                                                         |
| 95  | -1.2 | 5.48 | 4.1 | 6  | 1 | 1 | 33.0  | ENSP00000393746 | FYTTD1:p                                                                         |
| 96  | -1.2 | 5.91 | 1.5 | 2  | 1 | 1 | 56.6  | ENSP00000358417 | PHGDH:p , phosphoglycerate dehydrogenase<br>[Source:HGNC Symbol;Acc: HGNC:8923 ] |
| 97  | -1.2 | 5.57 | 1.1 | 2  | 1 | 1 | 83.1  | ENSP00000435557 | KIF21B:p                                                                         |
| 98  | -1.2 | 5.62 | 0.4 | 1  | 1 | 1 | 213.5 | ENSP00000352400 | NUP214:p                                                                         |
| 99  | -1.1 | 5.59 | 0.2 | 0  | 1 | 1 | 301.5 | ENSP00000402033 | PDZD2:p , PDZ domain containing 2<br>[Source: HGNC 18486 ]                       |
| 100 | -1.1 | 5.75 | 23  | 28 | 1 | 1 | 9.2   | ENSP00000430824 | CDK16:p                                                                          |
| 101 | -1.1 | 5.50 | 20  | 21 | 1 | 1 | 9.5   | ENSP00000436333 | PARP10:p                                                                         |
| 102 | -1.1 | 5.51 | 4.0 | 10 | 1 | 1 | 38.1  | ENSP00000364265 | FOXE1:p                                                                          |
| 103 | -1.1 | 5.72 | 4.3 | 13 | 1 | 1 | 55.0  | ENSP00000261622 | SLC7A5:p                                                                         |
| 104 | -1.1 | 5.28 | 1.9 | 3  | 1 | 1 | 42.2  | ENSP00000298317 | RPUSD4:p                                                                         |
| 105 | -1.1 | 5.76 | 1.7 | 3  | 1 | 1 | 44.1  | ENSP00000404464 | CCBE1:p                                                                          |
| 106 | -1.1 | 5.54 | 1.7 | 3  | 1 | 1 | 53.9  | ENSP00000321835 | ETV4:p                                                                           |
| 107 | -1.1 | 5.44 | 3.7 | 4  | 1 | 1 | 26.7  | ENSP00000413999 | CKMT1B:p                                                                         |
| 108 | -1.1 | 6.06 | 0.5 | 1  | 1 | 1 | 208.2 | ENSP00000371994 | NYNRIN:p                                                                         |
| 109 | -1.1 | 5.55 | 1.2 | 2  | 1 | 1 | 111.5 | ENSP00000435421 | C11orf82:p                                                                       |
| 110 | -1.1 | 5.79 | 1.2 | 2  | 1 | 1 | 102.4 | ENSP00000453574 | no protein information available                                                 |
| 111 | -1.1 | 5.70 | 1.1 | 1  | 1 | 1 | 112.8 | ENSP00000367787 | LIG3:p                                                                           |

## Supplementary Table 3

### Sequences of Oligos for Cloning

2A\* for: CGCCCCAGTCAAACAGACTCTCAACTTTGATCTACTCAAGCTGGCAGGTGATGTGGAATCTAACCCTGGATG  
2A\* rev: AATTCATCCAGGGTTAGATTCCACATCACCTGCCAGCTTGAGTAGATCAAAGTTGAGAGTCTGTTTGACTGGGGCGGTAC  
2A-P\* for: CGCCCCAGTCAAACAGACTCTCAACTTTGATCTACTCAAGCTGGCAGGTGATGTGGAATCTAACCCTGGACCATG  
2A-P\* rev: AATTCATGGTCCAGGGTTAGATTCCACATCACCTGCCAGCTTGAGTAGATCAAAGTTGAGAGTCTGTTTGACTGGGGCGGTAC  
2A<sup>M</sup>\* for: CGCACCCGTTAAGCAAACATTAATTTTCGACCTCTTGAAACTCGCCGGCGACGTTGAGAGCAATCCAGGCTG  
2A<sup>M</sup>\* rev: AATTCAGCCTGGATTGCTCTCAACGTCGCCGGCGAGTTTCAAGAGGTCGAAATTTAATGTTTGCTTAACGGGTGCGGTAC  
2A<sup>M</sup>-P\* for: CGCACCCGTTAAGCAAACATTAATTTTCGACCTCTTGAAACTCGCCGGCGACGTTGAGAGCAATCCAGGCCCTG  
2A<sup>M</sup>-P\* rev: AATTCAGGGCCCTGGATTGCTCTCAACGTCGCCGGCGAGTTTCAAGAGGTCGAAATTTAATGTTTGCTTAACGGGTGCGGTAC  
T2A\* for: CGCCACTAACTTTTCTCTACTCAAGCAGGCAGGTGATGTGGAAGAGAACCCTGGGTG  
T2A\* rev: AATTCACCCAGGGTTCTCTTCCACATCACCTGCCTGCTTGAGTAGAGAAAAGTTAGTGGCGGTAC  
T2A-P\* for: CGCCACTAACTTTTCTCTACTCAAGCAGGCAGGTGATGTGGAAGAGAACCCTGGGCCCTG  
T2A-P\* rev: AATTCAGGGCCCAGGGTTCTCTTCCACATCACCTGCCTGCTTGAGTAGAGAAAAGTTAGTGGCGGTAC  
CD99L2\* for: CCCTTTCTGTGTCTCTCTCCTTTCTCTTACAAAGATGCTTGTTAGTGGGTTTAAAGGCCACCTGGATAATCCAGGATG  
CD99L2\* rev: AATTCATCCTGGATTATCCAGGTGGGCCTTAAACCCACTAACAAGCATCTTTGTAAGAGAAAGGAGAGAGACACAGAAAGGGGTAC  
CD99L2-P\* for: CCCTTTCTGTGTCTCTCTCCTTTCTCTTACAAAGATGCTTGTTAGTGGGTTTAAAGGCCACCTGGATAATCCAGGACCATG  
CD99L2-P\* rev: AATTCATGGTCCTGGATTATCCAGGTGGGCCTTAAACCCACTAACAAGCATCTTTGTAAGAGAAAGGAGAGAGACACAGAAAGGGGTAC  
POTE\* for: CGTAATTTGCCAGTTACTTTCTGACTACAAAGAAAAACAGATGCTAAAAATCTCTTCTGAAAACAGCAATCCAGGTTG  
POTE\* rev: AATTC AACCTGGATTGCTGTTTTT CAGAAGAGATTTTTTAGCATCTGTTTTTCTTTGTAGTCAGAAAGTAAC TGGCAAATTACGGTAC  
POTE-P\* for: CGTAATTTGCCAGTTACTTTCTGACTACAAAGAAAAACAGATGCTAAAAATCTCTTCTGAAAACAGCAATCCAGGTCCATG  
POTE-P\* rev: AATTCATGGACCTGGATTGCTGTTTTT CAGAAGAGATTTTTTAGCATCTGTTTTTCTTTGTAGTCAGAAAGTAAC TGGCAAATTACGGTAC  
TBCA\* for: CGCCGATCCTCGCGTGAGACAGATCAAGATCAAGACCGGCGTGGTGAAGCGGCAGAGATCCTACAAGAATCCAGGATG  
TBCA\* rev: AATTCATCCTGGATTCTTGTAGGATCTCTGCCGCTTACCACGCCGGTCTTGATCTTGATCTGTCTCACGCGAGGATCGGCGGTAC  
TBCA-P\* for: CGCCGATCCTCGCGTGAGACAGATCAAGATCAAGACCGGCGTGGTGAAGCGGCAGAGATCCTACAAGAATCCAGGACCATG  
TBCA-P\* rev: AATTCATGGTCCTGGATTCTTGTAGGATCTCTGCCGCTTACCACGCCGGTCTTGATCTTGATCTGTCTCACGCGAGGATCGGCGGTAC  
SPIRE2\* for: CGGGGTACCGGGCTGCGGGGCTCGCCGGGCCGGCGCCTGCGGGATACCGGGGACCTCCTGCTGCGCGGGGACGGCTCGGTGCGGGCGCGG

### Supplementary Table 3

SPIRE2\* rev: CGGAATTCATCCTGGGTTTCTGACCTCTTCAACCGCGGCCTCGGGCTCCCGCGCCCCGACCGAGCCGTCCCCGCGCAGCAGGAGGTCCCC  
SPIRE2-P\* for: CGGGGTACCGGGCTGCGGGGCTCGCCGGGCCGGCGCCTGCGGGATACCGGGGACCTCCTGCTGCGCGGGGACGGCTCGGTTCGGGGCGCGG  
SPIRE2-P\* rev: CGGAATTCATGGTCCTGGGTTTCTGACCTCTTCAACCGCGGCCTCGGGCTCCCGCGCCCCGACCGAGCCGTCCCCGCGCAGCAGGAGGTTC  
C-TAIL\* for: CATGCACAGTGTAATATTTCTCCAAGTATCATCCAAAATTCCCCACAGACAAGGCTTTCGTCCTCATTAG  
C-TAIL\* rev: AATTCTAATGAGGACGAAAGCCTTGTCTGTGGGGAATTTGGATGATACTTGGAGAAATATTACACTGTGCATGGTAC  
C-TAIL-P\* for: CATGCACAGTGTAATATTTCTCCAAGTATCATCCAAAATTCCCCACAGACAAGGCTTTCGTCCTCATTAG  
C-TAIL-P\* rev: AATTCTAAGGATGAGGACGAAAGCCTTGTCTGTGGGGAATTTGGATGATACTTGGAGAAATATTACACTGTGCATGGTAC

### Sequences of Oligos for qRT-PCR and RT-PCR

scFv for: CAAACAGACTCTCAACT  
scFv rev: ATTTAGGTGACACTATAGAATA  
 $\alpha$ -Globin for: GCCGACAAGACCAACGTCAA  
 $\alpha$ -Globin rev: AGGTCGAAGTGCGGGAAGTA  
GAPDH for: GGGCGCCTGGTCACCAGGGCTGC  
GAPDH rev: GAGCCCCAGCCTTCTCCATGGTGG  
Ltn for: TGGTGCTGCGGAACTTTCAAAG  
Ltn rev: GCAGCTGGTGTGTAAGTATCAC
